# Supplementary material for: Inhaled recombinant human IL-15 in dogs with naturally occurring pulmonary metastases from osteosarcoma or melanoma: a phase 1 study of clinical activity and correlates of response
Source: HighWire-hosted journal article supplement (doi:10.1136/jitc-2022-004493), 2022-06-01
Supplement: jitc-2022-004493supp007_data_supplement.pdf [file jitc-2022-004493supp007_data_supplement.pdf]

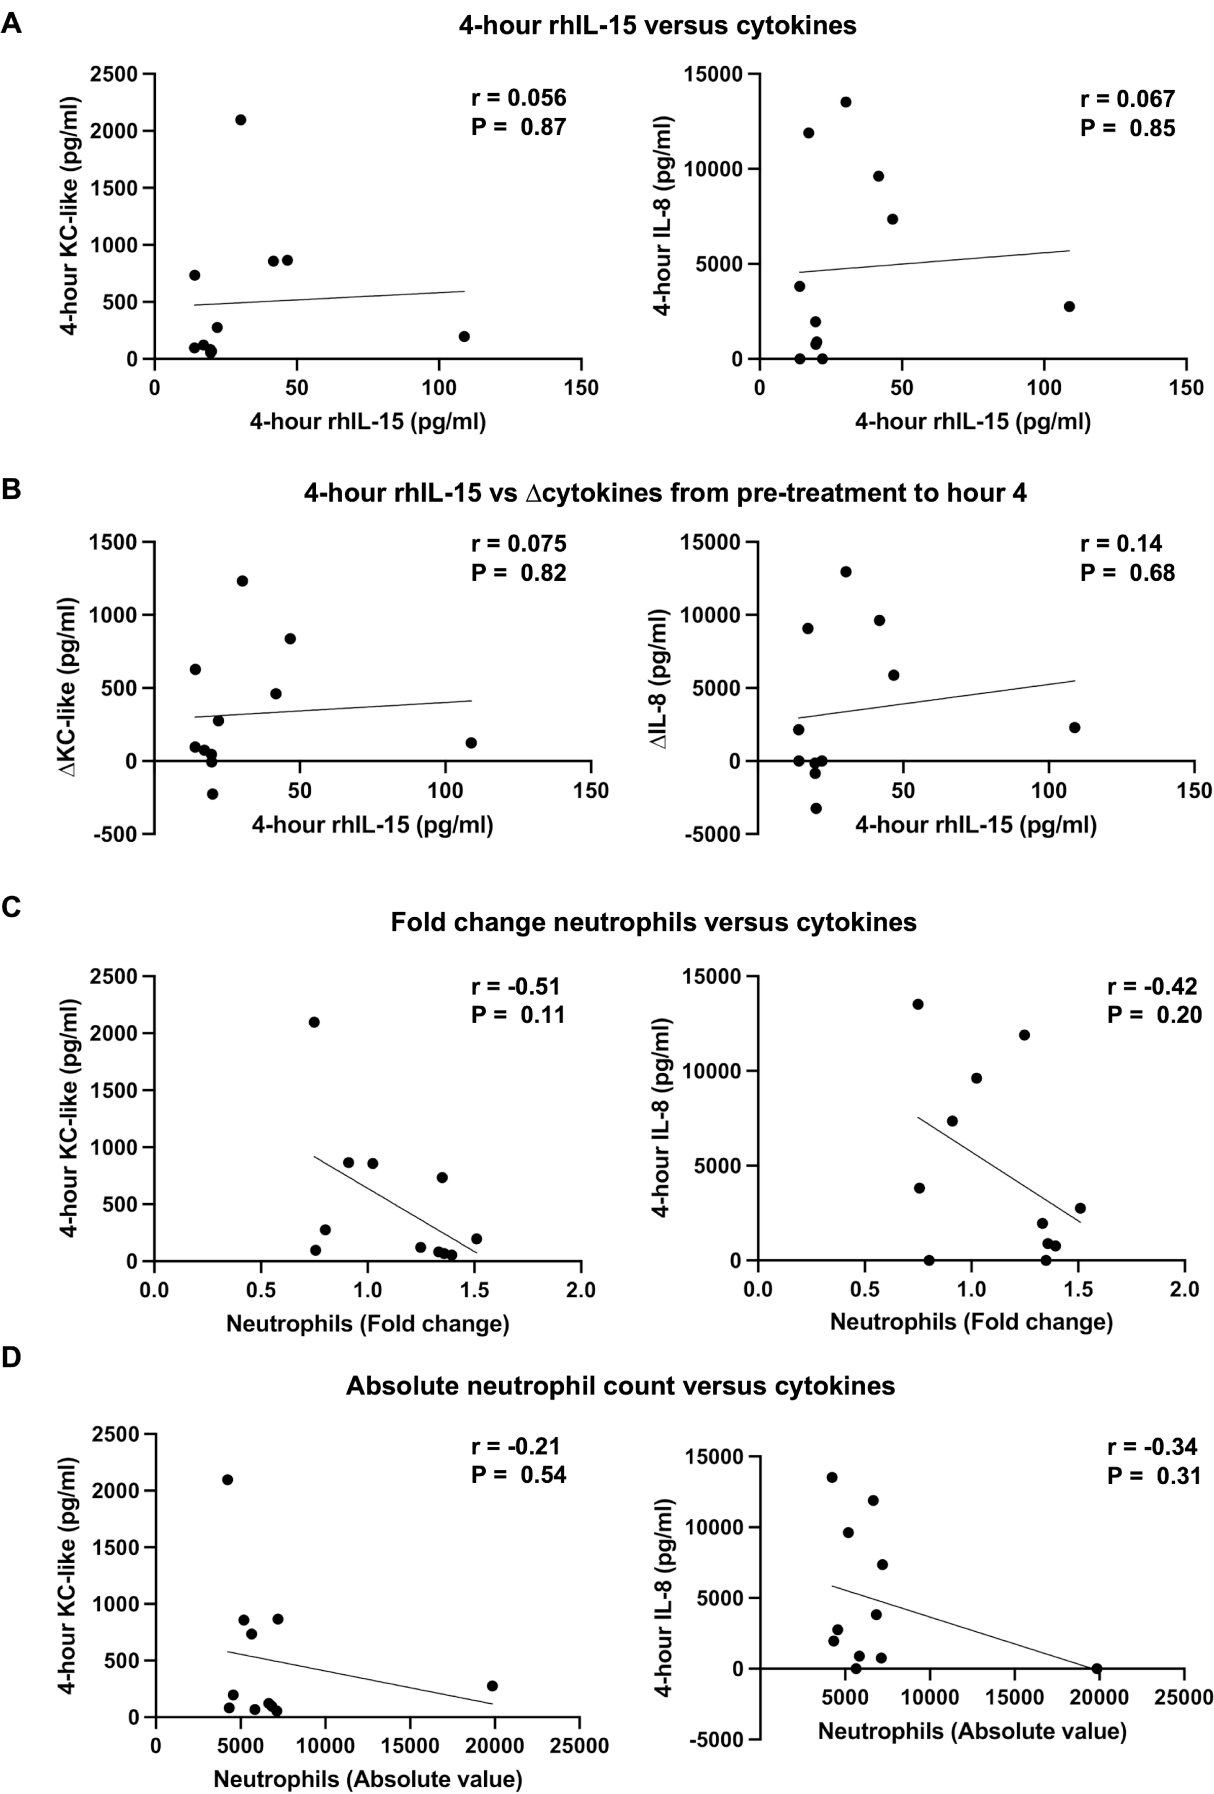

**Supplemental Figure 3. Lack of correlation among plasma cytokine levels at 4 hours and blood neutrophil counts.** Given rapid increases in 4-hour KC-like and IL-8, we analyzed plasma values for these cytokines. **(A)** There were no correlations of 4-hour recombinant human IL-15 (rhIL-15) with KC-like nor IL-8. **(B)** The correlations between rhIL-15 and the change in cytokine levels from pre-treatment to hour was not significant. **(C)** The correlations between 4-hour KC-like and IL-8 with fold change of neutrophils showed a negative trend, although not statistically significant. **(D)** No correlations were seen between absolute neutrophil counts and 4-hour cytokine levels.
