# Supplementary material for: Inhaled recombinant human IL-15 in dogs with naturally occurring pulmonary metastases from osteosarcoma or melanoma: a phase 1 study of clinical activity and correlates of response
Source: HighWire-hosted journal article supplement (doi:10.1136/jitc-2022-004493), 2022-06-01
Supplement: jitc-2022-004493supp008_data_supplement.pdf [file jitc-2022-004493supp008_data_supplement.pdf]

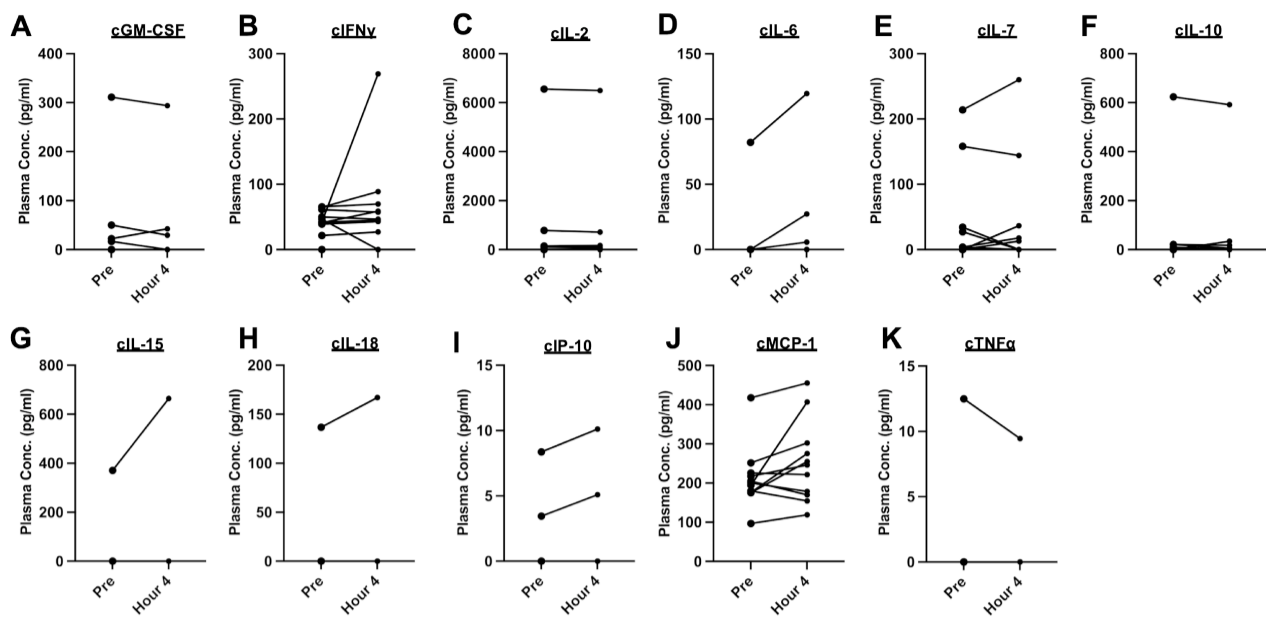

**Supplemental Figure 4. Plasma cytokine responses 4-hours post-inhalation of rhIL-15.** Individual cytokines (A-K) were quantified by canine Luminex assay in the plasma pre- and 4-hours post-initial treatment.
